# Supplementary material
Source: PubMed Central journal article supplement (PMC2964167)
Supplement: emboj2010218s2.pdf [file emboj2010218s2.pdf]

Manuscript EMBO-2010-74386

## Cooperative functions of Chk1 and Chk2 reduce tumor susceptibility in vivo

Hiroyuki Niida, Kazuhiro Murata, Midori Shimada, Kumiko Ogawa, Kumiko Ohta, Kyoko Suzuki, Hidetsugu Fujigaki, Aik Kia Khaw, Birendranath Banerjee, M. Prakash Hande, Tomomi Miyamoto, Ichiro Miyoshi, Tomoyuki Shirai, Noboru Motoyama, Mireille Delhase, Ettore Appella, and Makoto Nakanishi

*Corresponding author: Makoto Nakanishi, Graduate School of Medical Sciences, Nagoya City University*

---

### Review timeline:

Submission date:

02 April 2010

Accepted:

10 August 2010

---

### Transaction Report:

An earlier version of this manuscript was submitted to *The EMBO Journal* and assessed before January 2009. As the original review of the manuscript therefore predates the implementation of *The EMBO Journal's* transparent review process policy, no Peer Review Process file is available with this article.
